# Supplementary material for: AL-FEC for streaming services in LTE E-MBMS
Source: Springer Nature journal article supplement (doi:10.1186/1687-1499-2013-73), 2013-03-15

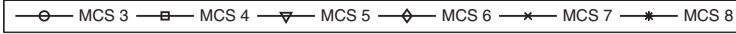

Pedestrian

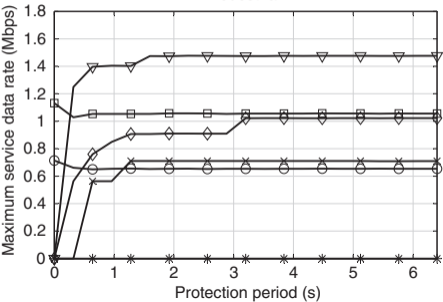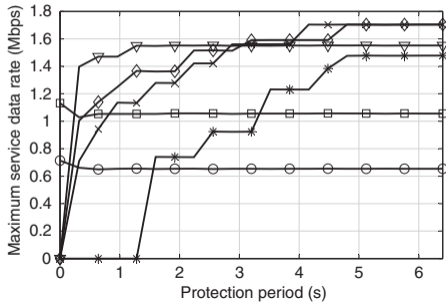

Supplement: 13638_2012_651_MOESM7_ESM.pdf [file 13638_2012_651_MOESM7_ESM.pdf]
