# Supplementary material for: AL-FEC for streaming services in LTE E-MBMS
Source: Springer Nature journal article supplement (doi:10.1186/1687-1499-2013-73), 2013-03-15

Coverage level (%) - MCS 7 -  $T_{pp} = 1.28$  s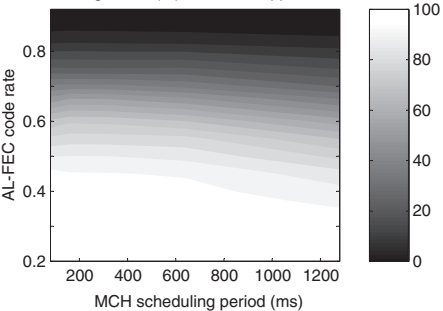Coverage level (%) - MCS 8 -  $T_{pp} = 5.12$  s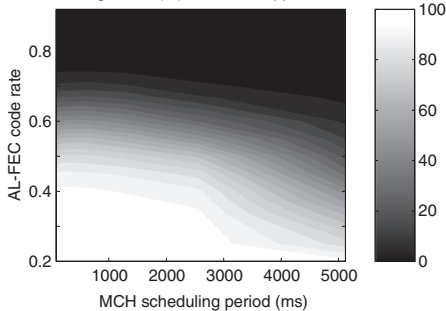

Supplement: 13638_2012_651_MOESM9_ESM.pdf [file 13638_2012_651_MOESM9_ESM.pdf]
